# Supplementary material for: Orosomucoid 2 inhibits tumor metastasis and is upregulated by CCAAT/enhancer binding protein β in hepatocellular carcinomas
Source: PubMed Central journal article supplement (PMC4599259; doi:10.18632/oncotarget.3867), 2015-04-19
Supplement: oncotarget-06-16106-s001.pdf [file oncotarget-06-16106-s001.pdf]

**Orosomuroid 2 inhibits tumor metastasis and is upregulated by CCAAT/enhancer binding protein  $\beta$  in hepatocellular carcinomas**

**Supplementary Material**

| <b>Supplementary Table 1.</b> The PCR primers for qRT-PCR. |         |                      |
|------------------------------------------------------------|---------|----------------------|
| ORM2                                                       | Forward | TCGGTTCAGGAGATCCAAGC |
|                                                            | Reverse | GAACAGCAGG GAGCAACAT |
| C/EBP $\beta$                                              | Forward | TCCAAACCAACCGCACAT   |
|                                                            | Reverse | GCAGAGGGAGAAGCAGAGAG |

**Supplementary Table 2.** Primers for vector constructs.

|                          |                |                                                                         |
|--------------------------|----------------|-------------------------------------------------------------------------|
| ORM2                     | Forward        | CGCGGATCCATGGCGCTGTCCTGGGTTC                                            |
|                          | Reverse        | CCGGAATTCCTAGGATTCCCCCTCCTCCT                                           |
| ORM2-promoter<br>-1500bp | Forward        | CGCGGTACCGTAGAGGAAGCAAAAAC                                              |
|                          | Reverse        | CCGAAGCTTCTGTAAGAACCCAGGACA                                             |
| ORM2-promoter<br>-500bp  | Forward        | CGCGGTACCATTGGTGAAAGAGAAGCAA                                            |
|                          | Reverse        | CCGAAGCTTCTGTAAGAACCCAGGACA                                             |
| ORM2-promoter<br>-300bp  | Forward        | CGCGGTACCCACAAACATACATCCCAT                                             |
|                          | Reverse        | CCGAAGCTTCTGTAAGAACCCAGGACA                                             |
| ORM2-promoter<br>-mutant | Big<br>primers | GTTTGGAGGCGGTGCTCCGAGCTGGCCTTTCATTTCCC<br>AAGTGCTGGCAGGATTGTGTCA        |
|                          |                |                                                                         |
| C/EBP $\beta$ (LAP1)     | Forward        | CGCGGATCCATGCAACGCCTGGTGGCCT                                            |
|                          | Reverse        | CCGGAATTCCTAGCAGTGGCCGGAGGAG                                            |
| C/EBP $\beta$ (LAP2)     | Forward        | CGCGGATCCATGGAAGTGGCCAACTTCT                                            |
|                          | Reverse        | CCGGAATTCCTAGCAGTGGCCGGAGGAG                                            |
| C/EBP $\beta$ (LIP)      | Forward        | CGCGGATCCATGGCGGCGGGCTTCCCGT                                            |
|                          | Reverse        | CCGGAATTCCTAGCAGTGGCCGGAGGAG                                            |
| sh-ORM2-1                | Forward        | CGCGTCCCCGAAACGAGGAGTACAATAATTCAAGAGAT<br>TATTGTACTCCTCGTTTCTTTTTGGAAAT |
|                          | Reverse        | CGATTTCCAAAAGAAACGAGGAGTACAATAATCTCTTG<br>AATTATTGTACTCCTCGTTTCGGGGA    |
| sh-ORM2-2                | Forward        | CGCGTCCCCGCTTCTATAACTCCAGTTATTCAAGAGATAA<br>CTGGAGTTATAGAAGCTTTTTGGAAAT |
|                          | Reverse        | CGATTTCCAAAAGCTTCTATAACTCCAGTTATCTCTTGA<br>ATAACTGGAGTTATAGAAGCGGGA     |

A

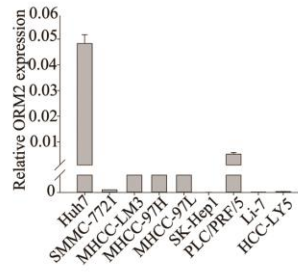

### Supplementary Figure 1

**The expression of ORM2 in HCC cell lines.** (a) qRT-PCR was performed to detect ORM2 expression in HCC cell lines.

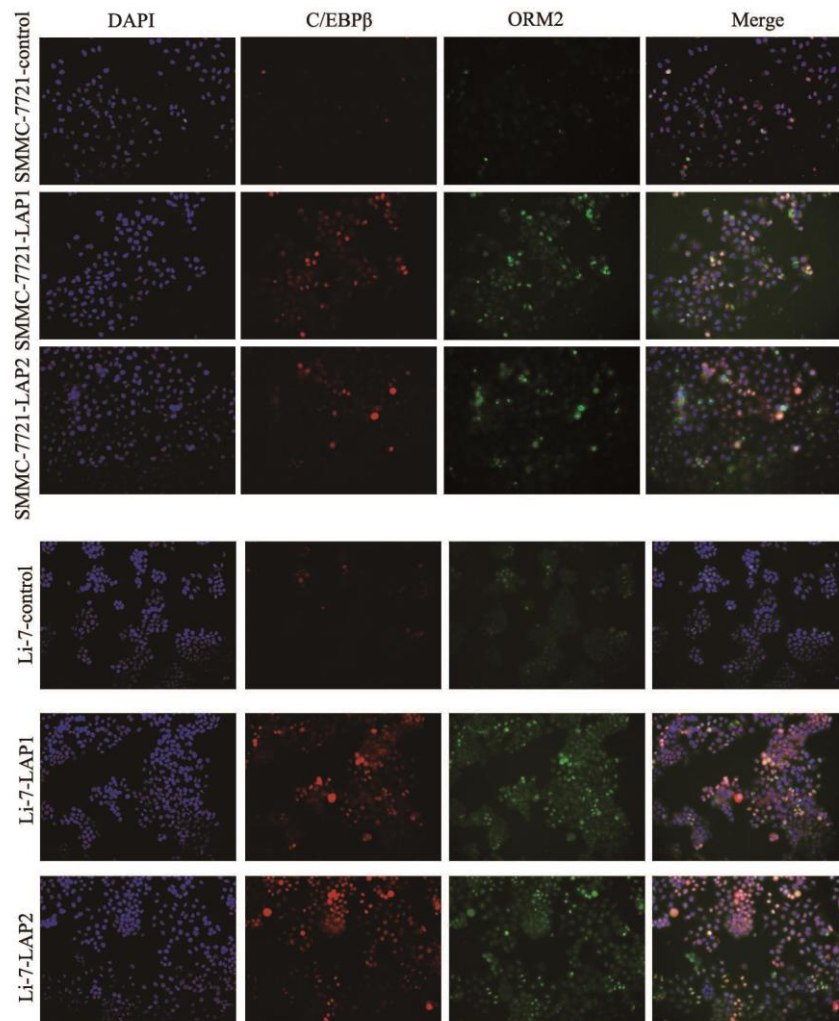

## Supplementary Figure 2

### Immunofluorescent co-staining of LAP1/2 and ORM2 proteins in HCC cell lines.

Immunofluorescence assays of co-expression of LAP1/2 (red) and ORM2 (green) proteins were carried out in SMMC-7721 and Li-7 cells with stably LAP1/2 overexpression (SMMC-7721-LAP1, -LAP2; Li-7-LAP1, -LAP2) and in the untreated control cells (SMMC-7721-control; Li-7- control). DAPI was used to counter-staining for nuclei (blue).

A

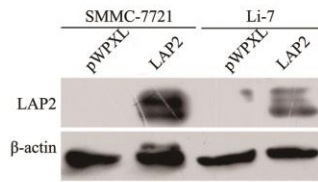

B

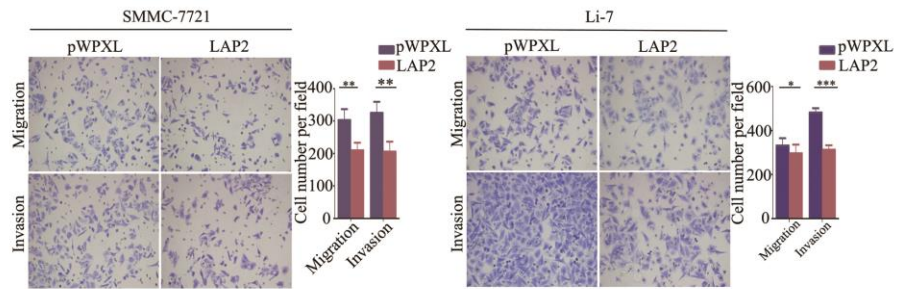

### Supplementary Figure 3

**LAP2 represses HCC cell migration and invasion ability *in vitro*.** (a) Western blotting of LAP2 protein levels in SMMC-7721 and Li-7 cells stably transfected with LAP2 or the control. (b) The migration and invasion ability of SMMC-7721 and Li-7 cells transfected with LAP2 were assessed by transwell assays; cells transfected with the empty vector were used as a control. \*,  $p < 0.05$ , \*\*,  $p < 0.01$ , \*\*\*,  $p < 0.001$ .
